# Supplementary material for: High-potency ligands for DREADD imaging and activation in rodents and monkeys
Source: PubMed Central journal article supplement (PMC6788984; doi:10.1038/s41467-019-12236-z), 2019-10-11
Supplement: 41467_2019_12236_MOESM3_ESM.pdf [file 41467_2019_12236_MOESM3_ESM.pdf]

## Reporting Summary

Nature Research wishes to improve the reproducibility of the work that we publish. This form provides structure for consistency and transparency in reporting. For further information on Nature Research policies, see [Authors & Referees](#) and the [Editorial Policy Checklist](#).

### Statistical parameters

When statistical analyses are reported, confirm that the following items are present in the relevant location (e.g. figure legend, table legend, main text, or Methods section).

n/a | Confirmed

- The exact sample size ( $n$ ) for each experimental group/condition, given as a discrete number and unit of measurement
- An indication of whether measurements were taken from distinct samples or whether the same sample was measured repeatedly
- The statistical test(s) used AND whether they are one- or two-sided  
*Only common tests should be described solely by name; describe more complex techniques in the Methods section.*
- A description of all covariates tested
- A description of any assumptions or corrections, such as tests of normality and adjustment for multiple comparisons
- A full description of the statistics including central tendency (e.g. means) or other basic estimates (e.g. regression coefficient) AND variation (e.g. standard deviation) or associated estimates of uncertainty (e.g. confidence intervals)
- For null hypothesis testing, the test statistic (e.g.  $F$ ,  $t$ ,  $r$ ) with confidence intervals, effect sizes, degrees of freedom and  $P$  value noted  
*Give  $P$  values as exact values whenever suitable.*
- For Bayesian analysis, information on the choice of priors and Markov chain Monte Carlo settings
- For hierarchical and complex designs, identification of the appropriate level for tests and full reporting of outcomes
- Estimates of effect sizes (e.g. Cohen's  $d$ , Pearson's  $r$ ), indicating how they were calculated
- Clearly defined error bars  
*State explicitly what error bars represent (e.g. SD, SE, CI)*

*Our web collection on [statistics for biologists](#) may be useful.*

### Software and code

Policy information about [availability of computer code](#)

Data collection

*Provide a description of all commercial, open source and custom code used to collect the data in this study, specifying the version used OR state that no software was used.*

Data analysis

*Provide a description of all commercial, open source and custom code used to analyse the data in this study, specifying the version used OR state that no software was used.*

For manuscripts utilizing custom algorithms or software that are central to the research but not yet described in published literature, software must be made available to editors/reviewers upon request. We strongly encourage code deposition in a community repository (e.g. GitHub). See the Nature Research [guidelines for submitting code & software](#) for further information.

### Data

Policy information about [availability of data](#)

All manuscripts must include a [data availability statement](#). This statement should provide the following information, where applicable:

- Accession codes, unique identifiers, or web links for publicly available datasets
- A list of figures that have associated raw data
- A description of any restrictions on data availability

All data is available in the main text or the supplementary materials.

## Field-specific reporting

Please select the best fit for your research. If you are not sure, read the appropriate sections before making your selection.

Life sciences  Behavioural & social sciences  Ecological, evolutionary & environmental sciences

For a reference copy of the document with all sections, see [nature.com/authors/policies/ReportingSummary-flat.pdf](https://www.nature.com/authors/policies/ReportingSummary-flat.pdf)

## Life sciences study design

All studies must disclose on these points even when the disclosure is negative.

|                 |                                                                                                                                                                                     |
|-----------------|-------------------------------------------------------------------------------------------------------------------------------------------------------------------------------------|
| Sample size     | Sample sizes were chosen based on our own results from previous experiments or reported data sets.                                                                                  |
| Data exclusions | No data were excluded from the analyses.                                                                                                                                            |
| Replication     | Behavioral experiments were replicated across different litters and time points. All attempts at replication were successful.                                                       |
| Randomization   | Not relevant for this study as allocation of samples/organisms was not needed or intended.A                                                                                         |
| Blinding        | Immunofluorescence and autoradiographic pictures were taken randomly from the slide without "searching" for a suitable area. For all other analyses experimenters were not blinded. |

## Reporting for specific materials, systems and methods

### Materials & experimental systems

| n/a                                 | Involvement in the study                                        |
|-------------------------------------|-----------------------------------------------------------------|
| <input checked="" type="checkbox"/> | <input type="checkbox"/> Unique biological materials            |
| <input type="checkbox"/>            | <input checked="" type="checkbox"/> Antibodies                  |
| <input type="checkbox"/>            | <input checked="" type="checkbox"/> Eukaryotic cell lines       |
| <input checked="" type="checkbox"/> | <input type="checkbox"/> Palaeontology                          |
| <input type="checkbox"/>            | <input checked="" type="checkbox"/> Animals and other organisms |
| <input checked="" type="checkbox"/> | <input type="checkbox"/> Human research participants            |

### Methods

| n/a                                 | Involvement in the study                        |
|-------------------------------------|-------------------------------------------------|
| <input checked="" type="checkbox"/> | <input type="checkbox"/> ChIP-seq               |
| <input checked="" type="checkbox"/> | <input type="checkbox"/> Flow cytometry         |
| <input checked="" type="checkbox"/> | <input type="checkbox"/> MRI-based neuroimaging |

## Antibodies

### Antibodies used

Chicken anti-GFP  
Supplier name: Abcam Inc.  
Catalog #: ab13970  
Clone name: polyclonal chicken  
Lot #: GR236651-5

Rabbit anti-HA  
Supplier name: Cell Signaling Technology  
Catalog #: C29F4  
Clone name: monoclonal rabbit  
Lot #: 8

Goat anti-rabbit Alexa488  
Supplier name: Invitrogen  
Catalog #: A-11034  
Clone name: polyclonal rabbit  
Lot #: 1737902

Goat anti-chicken Alexa546  
Supplier name: Invitrogen  
Catalog #: A-11040  
Clone name: polyclonal chicken  
Lot #: 1830310

Rabbit anti-mCherry  
Supplier name: Abcam Inc.  
Catalog #: ab167453  
Clone name: polyclonal rabbit  
Lot #: GR312817-7

Goat anti-rabbit Alex647  
Supplier name: Invitrogen  
Catalog #: A-21245  
Clone name: polyclonal rabbit  
Lot #: 1729791

Goat anti-chicken Alexa488  
Supplier name: Invitrogen  
Catalog #: A-11039  
Clone name: polyclonal chicken  
Lot #: 1691381

## Validation

Mitew S. et al., Pharmacogenetic stimulation of neuronal activity increases myelination in an axon-specific manner. *Nature communications* 9:306 (2018).

Sun X. et al., Distinct multilevel misregulations of Parkin and PINK1 revealed in cell and animal models of TDP-43 proteinopathy. *Cell Death & Disease* 9:953 (2018).

Brendel M. et al., Increase of TREM2 during Aging of an Alzheimer's Disease Mouse Model Is Paralleled by Microglial Activation and Amyloidosis. *Frontier Aging Neuroscience* 9:8 (2017).

Wang A.C. et al., Loss of O-GlcNAc glycosylation in forebrain excitatory neurons induces neurodegeneration. *Proc Natl Acad Sci USA* 113(52): 15120-15125 (2016).

Gascón S. et al., Transcription of the NR1 subunit of the N-methyl-D-aspartate receptor is down-regulated by excitotoxic stimulation and cerebral ischemia. *The Journal of Biological Chemistry* 280(41): 35018-35027 (2005).

Qamar S. et al., FUS Phase Separation Is Modulated by a Molecular Chaperone and Methylation of Arginine Cation- $\pi$  Interactions. *Cell* 173:720-734.e15 (2018).

Miller A.P. et al., Acute death of astrocytes in blast-exposed rat organotypic hippocampal slice cultures. *PLoS One* 12(3):e0173167 (2017).

Franklin T.B. et al., Prefrontal cortical control of a brainstem social behavior circuit. *Nature neuroscience* 20(2): 260-270 (2017).

## Eukaryotic cell lines

Policy information about [cell lines](#)

Cell line source(s)

Human HEK293 cells were obtained from ATCC (CRL-1573)

Authentication

N/A

Mycoplasma contamination

Cells were routinely tested for mycoplasma contamination using Mycoalert Mycoplasma detection kit from Lonza,

Commonly misidentified lines  
(See [ICLAC](#) register)

N/A

## Animals and other organisms

Policy information about [studies involving animals](#); [ARRIVE guidelines](#) recommended for reporting animal research

Laboratory animals

Wild-type mice (C57BL/6J) were ordered from Jackson Laboratories and rats (Sprague-Dawley) were ordered from Charles River. Rodents were male and ordered at ~6-weeks of age. Transgenic mice were bred at NIDA breeding facility. Transgenic mice expressing the enzyme cre recombinase under the control of the dopamine D1 receptor promoter (D1-Cre, FK150 line, C57BL/6J congenic, Gensat, RRID: MMRRC\_036916-UCD) were crossed with transgenic mice with cre recombinase-inducible expression of hM4Di DREADD (R26-hM4Di/mCitrine, Jackson Laboratory, stock no. 026219) or hM3Dq DREADD (R26-hM3Dq/mCitrine, Jackson Laboratory, stock no. 026220). Three male rhesus monkeys (*Macaca mulatta*) weighed 8 – 12 kg. All experiments and procedures followed NIH guidelines and were approved by each institute's animal care and use committees.

Wild animals

*Provide details on animals observed in or captured in the field; report species, sex and age where possible. Describe how animals were caught and transported and what happened to captive animals after the study (if killed, explain why and describe method; if released, say where and when) OR state that the study did not involve wild animals.*

Field-collected samples

*For laboratory work with field-collected samples, describe all relevant parameters such as housing, maintenance, temperature, photoperiod and end-of-experiment protocol OR state that the study did not involve samples collected from the field.*
